# Supplementary material for: Functions of MgH2 in hydrogen storage reactions of the 6LiBH4–CaH2 reactive hydride composite
Source: Royal Society of Chemistry journal article supplement (doi:10.1039/c2dt30945a), 2012-01-01
Supplement: c2dt30945a.pdf [file c2dt30945a.pdf]

## Supplementary Information:

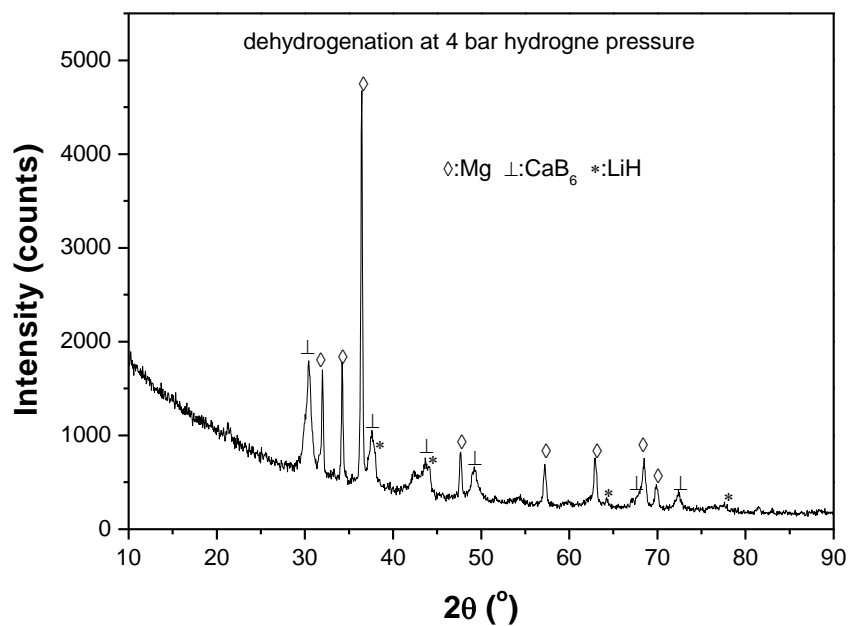

Fig. S1 XRD pattern of the dehydrogenated  $6\text{LiBH}_4\text{-CaH}_2\text{-3MgH}_2$  composite under 4 bar of  $\text{H}_2$ .

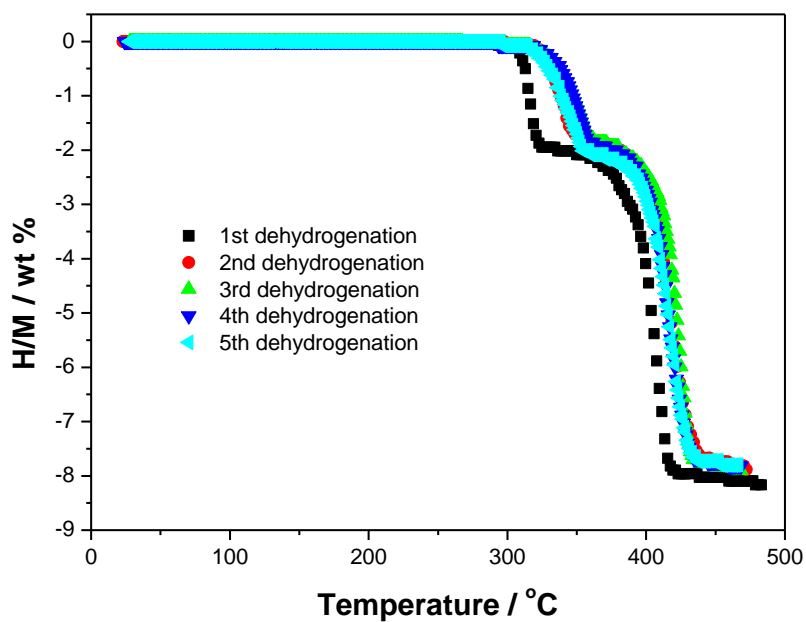

Fig. S2 Dehydrogenation curves of the  $6\text{LiBH}_4\text{-CaH}_2\text{-3MgH}_2$  sample in the initial five cycles

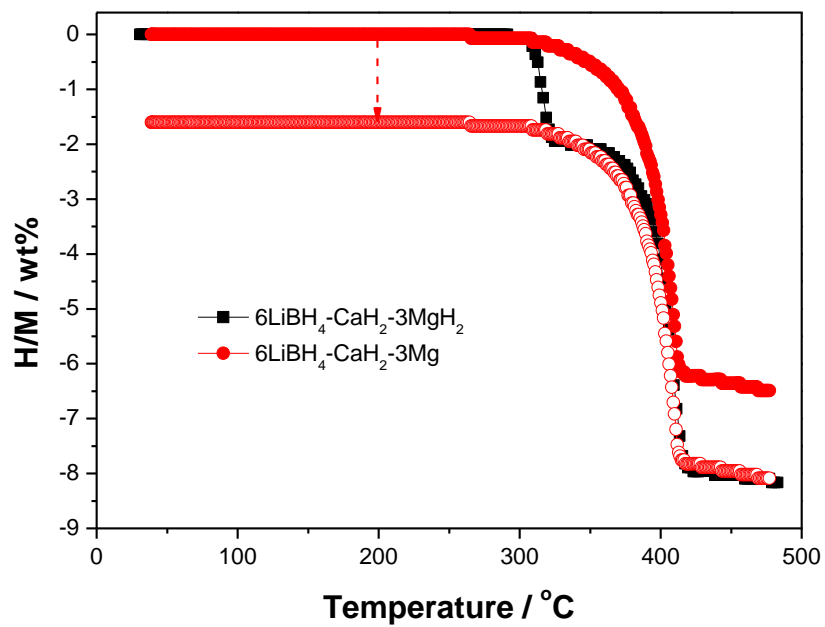

Fig. S3 Comparison on dehydrogenation behavior of the 6LiBH<sub>4</sub>-CaH<sub>2</sub>-3Mg and 6LiBH<sub>4</sub>-CaH<sub>2</sub>-3MgH<sub>2</sub> samples
